# Supplementary material
Source: Elsevier journal article supplement (https://www.sciencedirect.com/science/article/pii/S0009739X20302323)
Supplement: mmc2 [file S0009739X20302323:mmc2.docx]

Anexo II Lista colaboradores

| **Nombre, Apellido** |
| --- |
| Inmaculada Torrijo Gómez |
| José Noguera |
| Belén Conde Inarejos |
| Maria Rosario San Roman Romanillos |
| Mariluz Herrero |
| David Sanchez Relinque |
| Jose Maria Lloret Espí |
| Eduardo Alberto Rodriguez Martinez |
| Martin De Jesus Rodriguez Perdomo |
| Izaskun Balciscueta |
| Antonio Uceda Vañó |
| Juan Ignacio Rodriguez Campos |
| Ernesto Barzola |
| Álvaro Hernández Pérez |
| Germán Mínguez Ruiz |
| Isabel Jaén Torrejimeno |
| Aingeru Sarriugarte Lasarte |
| Aitor De La Quintana Basarrate |
| Maria Victoria Fernandez Illera |
| Gonzalo P. Martin-Martin |
| Víctor Turrado Rodríguez |
| Gemma Sugrañes Naval |
| Serrano-Navidad, Mónica |
| Constantino Fondevila |
| Fernando, Pardo Aranda |
| Ramón Soliva Domínguez |
| Eva Pinna |
| Ozlem Uyanik |
| Amador Garcia Ruiz De Gordejuela |
| M Angeles Boleko Ribas |
| Janice Velasco |
| Mikel Prieto Calvo |
| Carlos Loureiro |
| Rafael Abad |
| Laura Fernández Gomez-Cruzado |
| Adriana Cavero Ibiricu |
| Antonio Satorras Fioretti |
| Antonio Carlos, Maya Aparicio |
| María Jesús Castro Santiago |
| Diego Antonio Bernal Moreno |
| Susana, Roldán Ortiz |
|  |
| Pablo Rodríguez García |
| José Manuel Fernández Fernández |
| Mercedes Estaire Gómez |
| Ruben Ciria |
| Beatriz Martin-Perez |
| Alicia Calero |
| Pilar Serrano Paz |
| África Alcón |
| Úrsula, Ponce |
| Ainhoa Valle Rubio |
| Valentina Sosa Rodriguez |
| Laia Falgueras Verdaguer |
| Javier Gómez Sánchez |
| Esther Brea Gómez |
| Miriam Flores |
| Juana Morante Castaño |
| Daniel Bejarano Gonzalez-Serna |
| Andrés Gallardo Ortega |
| Teresa Giménez Maurel |
| Maria Auxiliadora, Amador Marchante |
| Sara, De Lebrusant Fernández |
| Javier Ulecia Moreno |
| Francisco José Cruz |
| José J Ceballos Esparragón |
| Ana Maria González Ganso |
| Alfredo Escartín Arias |
| Amando Marchal |
| Carlota García Fernández |
| Jose Manuel Couselo Villanueva |
| Carlos, Bustamante |
| Victor Vaello |
| Maria Dolores Pérez Diaz |
| Estibaliz Álvarez Peña |
| Oscar Roberto Marqueta Garcia |
| Carlos Cerdán Santacruz |
| Marcello Di Martino |
| Eduardo Lobo |
| Mariela Florez Gamarra |
| Jose Luis Lucena De La Poza |
| Sergio Cortese |
| Alicia Ruiz De La Hermosa |
| Belén, Porrero Guerrero |
| Riccardo Caruso |
| Tihomir, Georgiev-Hristov |
| Laura, Vega López |
| Sergio Olivares Pizarro |
| Pietro Giovanni Giordano |
| Paula Troncoso Pereira |
| Jorge Roldán De La Rúa |
| Belinda Sánchez Pérez |
| Claudio Antonio Guariglia |
| Ana, Ciscar |
|  |
|  |
| Nieto Soler, Antonio Adolfo |
| Marc Cubel |
| Isabel Ma Muñoz Núñez |
| Beatriz Gómez Pérez |
| Fco. Miguel González Valverde |
| Victor, Soria Aledo |
| Soriano Giménez |
| Vicente Olivares Ripoll |
| José María Octavio De Toledo Ubieto |
| Isabel Cifrián |
| Alicia Agaudo De Benito |
| Victoria M Maderuelo Garcia |
| Olga Claramonte Bellmunt |
| Jaime Bonnín Pascual |
| Carlos Jiménez Viñas |
| Juan Carlos Primo Alvarez |
| Xavier Garcia |
| Ismael, Mora-Guzmán |
| Toni Veres |
| Enrique Canelles Corell |
| María Jesús Segura |
| Jose E. Quiñones Sampedro |
| Iñigo Augusto Ponce |
| Sara Núñez |
| Jordi Comajuncosas |
| Daniel Troyano |
| Rajesh Gianchandani Moorjani |
| Dieter Morales García |
| Evaristo Varo |
| Miguel Angel Freiria Eiras |
| Pablo Parra Membrives |
| Salvador Morales-Conde |
| Eugenio Licardie |
| Juan Bellido |
| Esteban Peralta Demichelis |
| Esther María Cano Pecharromán |
| Mar Achalandabaso |
| Jose Farre Alegre |
| María Ángeles Martínez Serrano |
| Javier Rivera Castellano |
| Aitor Landaluce Olavarria |
| Carolina Martinez |
| Celia Baez |
| Javier Maupoey Ibáñez |
| Marina Garcés Albir |
| Javier, Lorenzo Pérez |
| Baltasar, Pérez Saborido |
| Mario Rodriguez-Lopez |
| Beatriz De Andrés Asenjo |
| Jordi Palacin |
| Vincenzo Vigorita |
| Andrea Jiménez Salido |
| Iñaki Martínez Rodríguez |
| Rosa Maria Saborit Montalt |
| Alejandro Serrablo |
| Juan Luis Blas Laina |
| Juan Carlos Martín Del Olmo |
| Joaquín Angás |
